# Supplementary material for: Motility of Colonial Choanoflagellates and the Statistics of Aggregate Random Walkers
Source: PubMed Central journal article supplement (PMC7616083; doi:10.1103/physrevlett.116.038102), 2016-01-22
Supplement: EMS196590-supplement-SI.pdf [file EMS196590-supplement-SI.pdf]

# Supplemental Information

Motility of Colonial Choanoflagellates  
and the Statistics of Aggregate Random Walkers

Julius B. Kirkegaard, Alan O. Marron, Raymond E. Goldstein

## Single cells

So-called ‘slow-swimmer’ *S. rosetta* unicells, similar in morphology to the individual cells that comprise a colony, clearly exhibit random walk behaviour. Fig. 1 shows the mean squared displacement of 32 *S. rosetta* slow-swimmers, each filmed for  $\sim 1.5$  minutes. The behaviour is well-described by the equation for conventional active random walkers,

$$\langle \Delta r^2 \rangle = (2v^2 / D_r^2) (D_r t + e^{-D_r t} - 1). \quad (1)$$

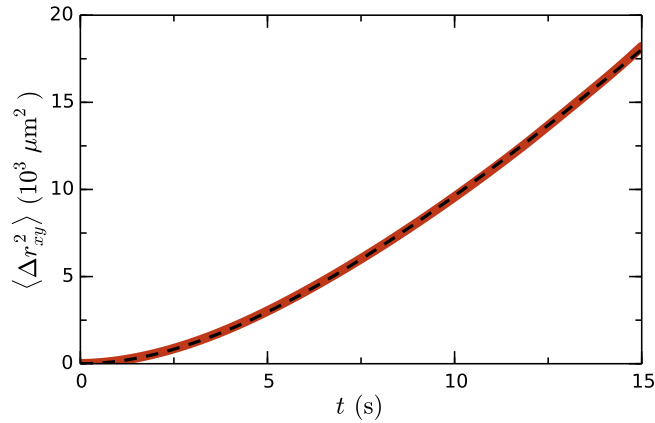

Figure 1: Squared distance moved averaged over 32 *S. rosetta* single cells. Overlaid fit (dashed) is to Eq. (1). Parameters:  $v = 12.3 \mu\text{m/s}$ ,  $D_r = 0.15 \text{ s}^{-1}$ .

The *active* rotational diffusion constants for both single cells and colonies (main text) are on the order of  $0.1 \text{ s}^{-1}$ . With a beat frequency  $f \sim 40 \text{ Hz}$ , this corresponds to a distribution of angular deviations per beat with standard deviation  $\sim \sqrt{D_r/f} = 3^\circ$ . The thermal rotational diffusion constant  $D_r^{\text{thermal}} = k_B T / 8\pi\mu a^3$  ranges from  $0.012$  to  $0.0014 \text{ s}^{-1}$  for radii  $2.5$  to  $5.0 \mu\text{m}$ , at least an order magnitude below the active one.

## Noise induced drift

The Langevin equations

$$d\mathbf{v}(t) = \boldsymbol{\omega}(t) \times \mathbf{v}(t) dt + \sqrt{2D_r} d\mathbf{W}_r(t) \otimes \mathbf{v}(t) \quad (2)$$

$$d\boldsymbol{\omega}(t) = \sqrt{2D_r} d\mathbf{W}_r(t) \otimes \boldsymbol{\omega}(t) \quad (3)$$

must be interpreted in the Stratonovich sense for the magnitude of  $\mathbf{v}$  and  $\boldsymbol{\omega}$  to not grow indefinitely. Using  $d\mathbf{W}_r(t) = (dW_1(t), dW_2(t), dW_3(t))$ , Eq. (3) can be written as

$$d\boldsymbol{\omega}(t) = \sqrt{2D_r} \begin{pmatrix} 0 & \omega_3(t) & -\omega_2(t) \\ -\omega_3(t) & 0 & \omega_1(t) \\ \omega_2(t) & -\omega_1(t) & 0 \end{pmatrix} \circ \begin{pmatrix} dW_1(t) \\ dW_2(t) \\ dW_3(t) \end{pmatrix} \equiv \boldsymbol{\sigma}(t) \circ \begin{pmatrix} dW_1(t) \\ dW_2(t) \\ dW_3(t) \end{pmatrix}. \quad (4)$$

and likewise for Eq. (2). The corresponding Itô equation becomes

$$d\boldsymbol{\omega}(t) = \boldsymbol{\sigma}(t) \cdot \begin{pmatrix} dW_1(t) \\ dW_2(t) \\ dW_3(t) \end{pmatrix} + \frac{1}{2} ((\boldsymbol{\sigma}(t) \cdot \nabla_{\boldsymbol{\omega}})^T \boldsymbol{\sigma}(t))^T dt \quad (5)$$

where  $T$  denotes transpose. The last term is the noise-induced drift, evaluating to

$$\frac{1}{2} [(\boldsymbol{\sigma}(t) \cdot \nabla_{\boldsymbol{\omega}})^T \boldsymbol{\sigma}(t)]_i = \frac{1}{2} \sum_{k=1}^3 \sum_{j=1}^3 \sigma_{kj} \frac{\partial \sigma_{ij}}{\partial \omega_k} = -2D_r \omega_i, \quad (6)$$

The calculation of  $\mathbf{v}(t)$  follows the same procedure, and yields  $-2D_r v_i$ .

### Derivation of random walker functions

Since the rotation angles  $\alpha$ ,  $\beta$ , and  $\gamma$  are Markov processes we can write the probability distribution functions as e.g.  $P(\alpha(t')) = N(\alpha_0, 2D_r t')$  and  $P(\alpha(t)|\alpha(t')) = N(\alpha(t'), 2D_r(t-t'))$  for  $t' < t$ , where  $N(\mu, \sigma^2)$  is the normal distribution. Using  $P(\alpha(t), \alpha(t')) = P(\alpha(t)|\alpha(t'))P(\alpha(t'))$  we obtain averages such as

$$\begin{aligned} \langle \cos \alpha(t) \cos \alpha(t') \rangle &= \int_{-\infty}^{\infty} dx \int_{-\infty}^{\infty} dy \cos(x) \cos(y) \\ &\quad \times N_x(\alpha_0, 2D_r \min(t, t')) N_y(x, 2D_r |t-t'|) \\ &= \frac{1}{2} e^{-D_r |t-t'|} (1 + \cos(2\alpha_0) e^{-4D_r \min(t, t')}), \end{aligned} \quad (7)$$

which in the stationary limit can be used to find the velocity autocorrelations, e.g.

$$\begin{aligned} \langle v_x(t) v_x(s) \rangle &= \left\langle (v_\omega \cos(\beta(t)) \cos(\gamma(t)) \cos(\omega_0 t) + v_p \sin(\beta(t)) \right. \\ &\quad - v_\omega \cos(\beta(t)) \sin(\gamma(t)) \sin(\omega_0 t)) \times (v_p \sin(\beta(s)) \\ &\quad \left. + v_\omega \cos(\beta(s)) \cos(\gamma(s)) \cos(\omega_0 s) - v_\omega \cos(\beta(s)) \sin(\gamma(s)) \sin(\omega_0 s)) \right\rangle \\ &= \frac{1}{2} v_p^2 e^{-D_r |t-s|} + \frac{1}{4} v_\omega^2 e^{-2D_r |t-s|} \cos(\omega_0(t-s)). \end{aligned} \quad (8)$$

The function only depends on the time difference  $t-s$ , which is the case for stationary autocorrelations (this is the very definition of a *weakly* stationary process). From

$$\begin{aligned} v_y(t) &= -v_p \sin(\alpha(t)) \cos(\beta(t)) + v_\omega ([\sin(\alpha(t)) \sin(\beta(t)) \cos(\gamma(t)) \\ &\quad + \cos(\alpha(t)) \sin(\gamma(t))] \cos(\omega_0 t) + [\cos(\alpha(t)) \cos(\gamma(t)) \\ &\quad - \sin(\alpha(t)) \sin(\beta(t)) \sin(\gamma(t))] \sin(\omega_0 t) \end{aligned} \quad (9)$$

we find in a similar manner

$$\langle v_y(t) v_y(s) \rangle = \frac{1}{4} v_p^2 e^{-2D_r |t-s|} + \frac{1}{8} v_\omega^2 (e^{-3D_r |t-s|} + 2e^{-2D_r |t-s|}) \cos(\omega_0(t-s)), \quad (10)$$

and the same for  $\langle v_z(t)v_z(s) \rangle$ . We project on to a random 2D plane by summing the  $x, y, z$  results followed by multiplication of 2/3 (this gives a different result than simply summing the  $x$  and  $y$  components due to the asymmetry induced by the approximation). We thus find

$$\langle v(\Delta t) \cdot v(0) \rangle = \frac{e^{-2D_r|\Delta t|}}{6} \left[ 2v_p^2 \left( 1 + e^{D_r|\Delta t|} \right) + v_\omega^2 \left( 3 + e^{-D_r|\Delta t|} \right) \cos(\omega_0 \Delta t) \right]. \quad (11)$$

The mean squared displacement is obtained by integrating the autocorrelation twice

$$\begin{aligned} \langle \Delta r^2(t) \rangle &= \int_0^t \int_0^t \langle v(t') \cdot v(t'') \rangle dt' dt'' \\ &= \frac{v_p^2 e^{-2D_r t}}{6D_r^2} \left( 1 + 4e^{D_r t} \right) + 4D_\infty t - a_0 \\ &\quad + v_\omega^2 e^{-2D_r t} \left( \frac{4D_r^2 - \omega_0^2}{(4D_r^2 + \omega_0^2)^2} + \frac{9D_r^2 - \omega_0^2}{3(9D_r^2 + \omega_0^2)^2} e^{-D_r t} \right) \cos \omega_0 t \\ &\quad - v_\omega^2 e^{-2D_r t} \left( \frac{4\omega_0 D_r}{(4D_r^2 + \omega_0^2)^2} + \frac{2\omega_0 D_r}{(9D_r^2 + \omega_0^2)^2} e^{-D_r t} \right) \sin \omega_0 t, \end{aligned} \quad (12)$$

where

$$a_0 = \frac{5v_p^2}{6D_r^2} + v_\omega^2 \left( \frac{4D_r^2 - \omega_0^2}{(4D_r^2 + \omega_0^2)^2} + \frac{9D_r^2 - \omega_0^2}{3(9D_r^2 + \omega_0^2)^2} \right). \quad (13)$$

As  $t \rightarrow \infty$ ,  $\langle \Delta r^2 \rangle \sim 4D_\infty t$ , where

$$D_\infty = \lim_{t \rightarrow \infty} \frac{\langle \Delta r^2 \rangle}{4t} = \frac{v_p^2}{4D_r} + \frac{v_\omega^2 D_r}{4} \left( \frac{1}{9D_r^2 + \omega_0^2} + \frac{2}{4D_r^2 + \omega_0^2} \right). \quad (14)$$

The existence of the above (non-zero) limit confirms the diffusive behaviour.

### Comparison of fit parameters

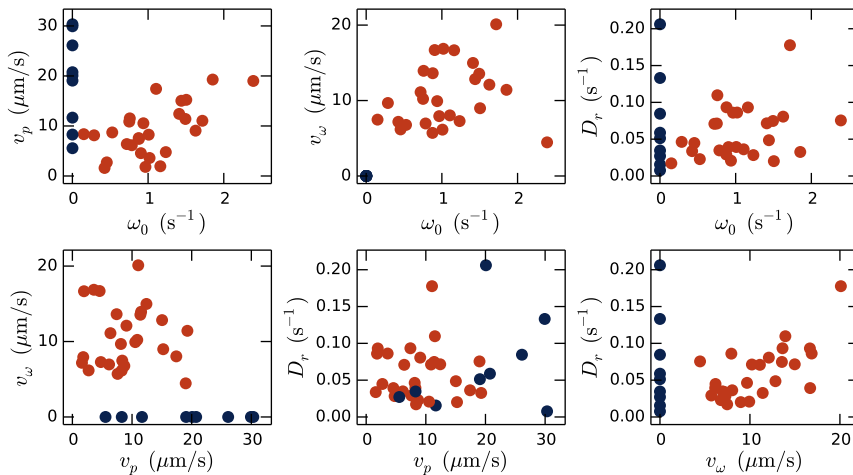

Figure 2: Comparison of fit parameters of 36 tracks. Tracks where  $\omega_0, v_\omega$  could be determined in red and tracks where  $\omega_0, v_\omega$  are forced to zero in blue.

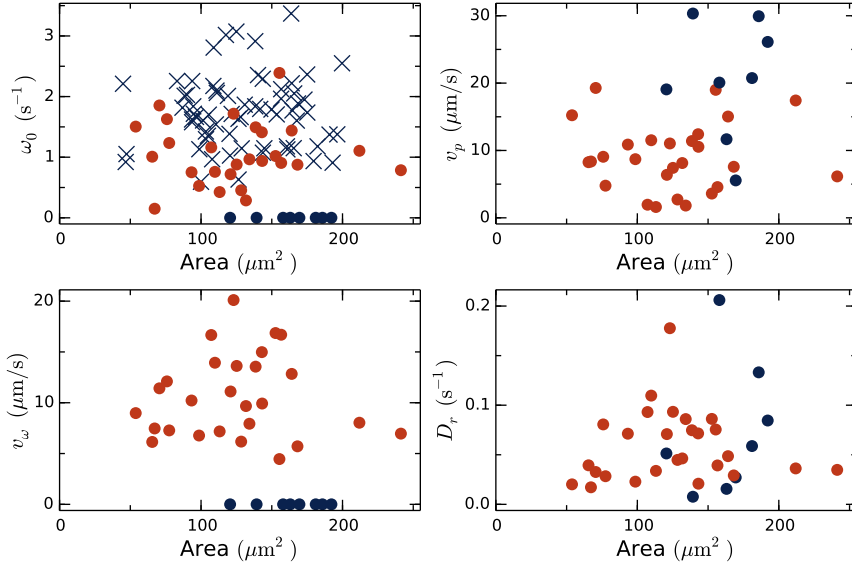

Figure 3: Comparison of fit parameters of 36 tracks to size of colony. Tracks where  $\omega_0, v_\omega$  could be determined in red and tracks where  $\omega_0, v_\omega$  are forced to zero in blue.  $\omega_0$  plot additionally includes estimates from the short track data in blue crosses.

Fig. 2 shows scatter plots of fit parameters of the model to 36 different *S. rosetta* colonies, indicating the high variances of all parameters. We note, however, that the determination of some parameters is difficult in certain regions. For instance,  $\omega_0$  and  $v_\omega$  are hard to determine when either one becomes small, and accordingly we have forced them to zero in these cases and plotted them in blue. Naturally, these cases will have a higher  $v_p$  as is clear in the two plots in the left part of Fig. 2.

Applying the same area estimator as in Fig. 4 of the main text, the parameters can also be plotted as a function of size. Just as with swimming speed, Fig. 3 shows that the model parameters have very high variances and no clear dependence on size. For a subset of the short tracks we were able to fit the model well enough to estimate  $\omega_0$  and these are shown as blue crosses. However, the short track colonies for which good estimates could be obtained are biased towards high  $\omega_0$  (and  $v_\omega$ ). Nonetheless, there is no clear tendency for larger colonies to rotate slower as is the case for e.g. bacterial clumps [1]. For an interesting example of a big fast-spinning colony see the end of Supplemental Video 2, in which a colony has formed a dumbbell shape.

## References

- [1] J. Schwarz-Linek, C. Valeriani, A. Cacciuto, M.E. Cates, D. Marenduzzo, A.N. Morozov, and W.C.K. Poon, Phase separation and rotor self-assembly in active particle suspensions, *Proc. Natl. Acad. Sci. USA* **109**, 4052-4057 (2012).
